# Supplementary material for: Discovering the differential and gendered consequences of natural disasters on the gender gap in life expectancy in Southeast Asia
Source: Copernicus journal article supplement (doi:10.5194/nhess-2017-370), 2017-10-24
Supplement: Supplementary file 1 [file Dataset_Murillo.xls]

## Sheet: NOTES
HYPOTHESES
Hypothesis 1: Natural disasters reduce the life expectancy of women relatively more than that of men and the result is likely to increase as the natural disaster strengthens.
Hypothesis 2: Natural disasters reduce the life expectancy of women relatively more than that of men and this effect is more likely to increase in countries with lower women's socioeconomic and political status
Hypothesis 2: Natural disasters reduce the life expectancy of women relatively more than that of men and this effect is more likely to increase in countries that are highly vulnerable to the impacts of climate change
DATA
Country
Year
Population
Deaths	natural disaster casualties
Magnitude	Death x Population * 10,000
Male Life Expectancy
Female Life Expectancy
Gender Gap in Life Expectancy	Ratio of female to male life expectancy
Economic	Women's economic rights
Political	Women's political rights
Social	Women's social rights (note: no data available after 2005)
Vulnerability index	Country's yearly vulnerability index (note: the higher the value, the more vulnerable the country is)
Democracy index	additional control variable (note: the higher the value, the more democractic the country is)
GDP	additional control variable

## Sheet: DATA SET NEW
Country	Year	Deaths	Population	DeathXPop	Magnitude100k	Magnitude	Magnitude 10k	MaleEX	FemaleEX	GenderGapLife	Weco	Wpol	WomenAVE	WomenSEPrights	Vulnerability	VulnerabilityIndex	Democracy
1	1995	0	10694459	0	0	0	0	54	59	1.09259	1	2	1.5	1	0.574503	3	3				3	3
1	1996	59	11022162	5.35285e-06	0.535285	1	0.0535285	54.5	59.4	1.08991	1	2	1.5	1	0.585304	3	3
1	1997	28	11338733	2.46941e-06	0.246941	1	0.0246941	55	59.8	1.08727	1	2	1.5	1	0.585085	3	0
1	1998	490	11641509	4.20908e-05	4.20908	3	0.420908	55.4	60.1	1.08484	1	2	1.5	1	0.576256	3	3
1	1999	63	11928306	5.28155e-06	0.528155	1	0.0528155	55.8	60.4	1.08244	1	2	1.5	1	0.569005	3	3
1	2000	347	12197905	2.84475e-05	2.84475	3	0.284475	56.1	60.6	1.08021	1	2	1.5	1	0.56565	3	3
1	2001	56	12448881	4.4984e-06	0.44984	1	0.044984	56.4	60.8	1.07801	1	2	1.5	1	0.566005	3	3
1	2002	29	12681984	2.28671e-06	0.228671	1	0.0228671	56.6	60.9	1.07597	1	2	1.5	1	0.558814	2	3
1	2003	0	12901217	0	0	0	0	57	61.5	1.07895	2	2	2	2	0.555297	2	3
1	2004	0	13112334	0	0	0	0	57.5	62	1.07826	2	2	2	2	0.554356	2	3
1	2005	23	13320058	1.72672e-06	0.172672	1	0.0172672	57.9	62.4	1.07772	1	2	1.5	1	0.558088	2	3
1	2006	5	13525360	3.69676e-07	0.0369676	1	0.00369676	58.3	62.9	1.0789	1	2	1.5	1	0.562993	3	3
1	2007	184	13728700	1.34026e-05	1.34026	2	0.134026	58.8	63.4	1.07823	2	2	2	2	0.560093	3	3
1	2008	0	13933660	0	0	0	0	59.2	63.9	1.07939	1	2	1.5	1	0.547722	2	3
1	2009	19	14144337	1.34329e-06	0.134329	1	0.0134329	59.6	64.3	1.07886	1	2	1.5	1	0.542499	2	3
1	2010	8	14363586	5.56964e-07	0.0556964	1	0.00556964	60	64.7	1.07833	1	2	1.5	1	0.53791	2	3
1	2011	247	14593099	1.69258e-05	1.69258	2	0.169258	60.3	65.1	1.0796	1	2	1.5	1	0.533029	2	3
2	1995	239	196957845	1.21346e-06	0.121346	1	0.0121346	64	68.6	1.07187	1	2	1.5	1	0.450355	1	0
2	1996	402	199926615	2.01074e-06	0.201074	1	0.0201074	64.4	69	1.07143	1	2	1.5	1	0.450979	1	0
2	1997	1130	202853850	5.57051e-06	0.557051	1	0.0557051	64.7	69.4	1.07264	1	2	1.5	1	0.4464	1	0
2	1998	1490	205753493	7.24168e-06	0.724168	1	0.0724168	65	69.7	1.07231	1	2	1.5	1	0.448619	1	0
2	1999	162	208644079	7.76442e-07	0.0776442	1	0.00776442	65.3	70.1	1.07351	1	2	1.5	1	0.448886	1	7
2	2000	564	211540428	2.66616e-06	0.266616	1	0.0266616	65.6	70.4	1.07317	1	2	1.5	1	0.444436	1	7
2	2001	587	214448301	2.73726e-06	0.273726	1	0.0273726	65.9	70.8	1.07436	1	2	1.5	1	0.438849	1	7
2	2002	290	217369087	1.33414e-06	0.133414	1	0.0133414	66.2	71.1	1.07402	1	2	1.5	1	0.44212	1	7
2	2003	534	220307809	2.42388e-06	0.242388	1	0.0242388	66.5	71.5	1.07519	1	2	1.5	1	0.443389	1	7
2	2004	166604	223268606	0.000746204	74.6204	4	7.46204	65.6	69.1	1.05335	1	2	1.5	1	0.445177	1	8
2	2005	1325	226254703	5.85623e-06	0.585623	1	0.0585623	67.1	72.1	1.07452	1	2	1.5	1	0.439534	1	8
2	2006	7421	229263980	3.23688e-05	3.23688	3	0.323688	67.4	72.4	1.07418	0	2	1	0	0.438319	1	8
2	2007	979	232296830	4.21444e-06	0.421444	1	0.0421444	67.7	72.8	1.07533	1	2	1.5	1	0.434148	1	8
2	2008	144	235360765	6.11827e-07	0.0611827	1	0.00611827	68	73.1	1.075	1	2	1.5	1	0.431057	1	8
2	2009	1485	238465165	6.22732e-06	0.622732	1	0.0622732	68.3	73.4	1.07467	0	2	1	0	0.426005	1	8
2	2010	1294	241613126	5.35567e-06	0.535567	1	0.0535567	68.5	73.7	1.07591	1	2	1.5	1	0.424937	1	8
2	2011	129	244808254	5.26943e-07	0.0526943	1	0.00526943	68.8	74	1.07558	1	2	1.5	1	0.425726	1	8
3	1995	60	4857774	1.23513e-05	1.23513	2	0.123513	49.3	52.8	1.07099	1	2	1.5	1	0.561184	3	0
3	1996	30	4966303	6.04071e-06	0.604071	1	0.0604071	50.3	53.8	1.06958	1	2	1.5	1	0.573515	3	0
3	1997	0	5068658	0	0	0	0	51.3	54.8	1.06823	1	2	1.5	1	0.580528	3	0
3	1998	0	5165072	0	0	0	0	52.3	55.8	1.06692	1	2	1.5	1	0.570885	3	0
3	1999	0	5256207	0	0	0	0	53.2	56.8	1.06767	2	2	2	2	0.576331	3	0
3	2000	59	5342879	1.10427e-05	1.10427	2	0.110427	54.1	57.7	1.06654	2	2	2	2	0.580272	3	0
3	2001	0	5424701	0	0	0	0	55	58.6	1.06545	2	2	2	2	0.559798	2	0
3	2002	2	5502340	3.63482e-07	0.0363482	1	0.00363482	55.9	59.4	1.06261	2	2	2	2	0.557981	2	0
3	2003	0	5579003	0	0	0	0	56.7	60.3	1.06349	2	2	2	2	0.549624	2	0
3	2004	0	5658894	0	0	0	0	57.5	61.1	1.06261	2	2	2	2	0.550306	2	0
3	2005	0	5745012	0	0	0	0	58.4	61.9	1.05993	2	2	2	2	0.542767	2	0
3	2006	0	5838837	0	0	0	0	58.7	62.3	1.06133	2	2	2	2	0.539374	2	0
3	2007	2	5939634	3.36721e-07	0.0336721	1	0.00336721	59.1	62.7	1.06091	2	2	2	2	0.526775	2	0
3	2008	6	6045439	9.92484e-07	0.0992484	1	0.00992484	59.4	63.1	1.06229	3	2	2.5	3	0.530917	2	0
3	2009	26	6153153	4.22548e-06	0.422548	1	0.0422548	59.8	63.5	1.06187	2	2	2	2	0.519721	2	0
3	2010	0	6260544	0	0	0	0	60.1	63.9	1.06323	1	2	1.5	1	0.521942	2	0
3	2011	48	6366909	7.53898e-06	0.753898	1	0.0753898	60.5	64.4	1.06446	1	2	1.5	1	0.512433	2	0
4	1995	20	20725374	9.65001e-07	0.0965001	1	0.00965001	66.8	72	1.07784	1	2	1.5	1	0.386404	0	4
4	1996	333	21260881	1.56626e-05	1.56626	2	0.156626	67.1	72.4	1.07899	1	2	1.5	1	0.386557	0	4
4	1997	97	21808125	4.44788e-06	0.444788	1	0.0444788	67.4	72.7	1.07864	1	2	1.5	1	0.384291	0	4
4	1998	105	22358128	4.69628e-06	0.469628	1	0.0469628	67.7	73	1.07829	2	2	2	2	0.38256	0	4
4	1999	1	22898579	4.36708e-08	0.00436708	1	0.000436708	67.9	73.3	1.07953	2	2	2	2	0.383341	0	4
4	2000	16	23420751	6.83155e-07	0.0683155	1	0.00683155	68.2	73.6	1.07918	2	2	2	2	0.380877	0	4
4	2001	11	23920963	4.59848e-07	0.0459848	1	0.00459848	68.5	73.9	1.07883	2	2	2	2	0.378494	0	4
4	2002	12	24401977	4.91763e-07	0.0491763	1	0.00491763	68.8	74.2	1.07849	2	2	2	2	0.37979	0	4
4	2003	10	24869423	4.021e-07	0.04021	1	0.004021	69	74.5	1.07971	1	2	1.5	1	0.372835	0	4
4	2004	97	25332026	3.82914e-06	0.382914	1	0.0382914	69.3	74.8	1.07937	1	2	1.5	1	0.376574	0	4
4	2005	13	25796124	5.03952e-07	0.0503952	1	0.00503952	69.6	75.1	1.07902	1	2	1.5	1	0.368186	0	4
4	2006	6	26263048	2.28458e-07	0.0228458	1	0.00228458	69.8	75.4	1.08023	1	2	1.5	1	0.367322	0	4
4	2007	102	26730607	3.81585e-06	0.381585	1	0.0381585	70.1	75.7	1.07989	3	2	2.5	3	0.366269	0	4
4	2008	0	27197419	0	0	0	0	70.3	75.9	1.07966	1	2	1.5	1	0.354475	0	6
4	2009	0	27661017	0	0	0	0	70.6	76.2	1.07932	1	2	1.5	1	0.351007	0	6
4	2010	0	28119500	0	0	0	0	70.8	76.5	1.08051	1	2	1.5	1	0.347828	0	6
4	2011	18	28572970	6.29966e-07	0.0629966	1	0.00629966	71.1	76.7	1.07876	1	2	1.5	1	0.34718	0	6
5	1995	51	44710931	1.14066e-06	0.114066	1	0.0114066	56.8	60.8	1.07042	1	0	0.5	0	0.556995	2	0
5	1996	0	45290888	0	0	0	0	57.2	61.2	1.06993	1	0	0.5	0	0.555011	2	0
5	1997	68	45895991	1.48161e-06	0.148161	1	0.0148161	57.6	61.7	1.07118	1	0	0.5	0	0.553135	2	0
5	1998	0	46509586	0	0	0	0	58	62.1	1.07069	1	0	0.5	0	0.550752	2	0
5	1999	22	47106923	4.67023e-07	0.0467023	1	0.00467023	58.4	62.5	1.07021	1	0	0.5	0	0.548346	2	0
5	2000	0	47669791	0	0	0	0	58.7	63	1.07325	1	0	0.5	0	0.54448	2	0
5	2001	51	48195684	1.05819e-06	0.105819	1	0.0105819	59.1	63.4	1.07276	2	0	1	0	0.540733	2	0
5	2002	21	48689952	4.313e-07	0.04313	1	0.004313	59.5	63.8	1.07227	2	0	1	0	0.537687	2	0
5	2003	0	49151958	0	0	0	0	59.8	64.2	1.07358	1	0	0.5	0	0.533704	2	0
5	2004	307	49582751	6.19167e-06	0.619167	1	0.0619167	60.2	64.6	1.07309	1	0	0.5	0	0.524074	2	0
5	2005	17	49984704	3.40104e-07	0.0340104	1	0.00340104	60.5	65	1.07438	1	0	0.5	0	0.520726	2	0
5	2006	59	50355559	1.17167e-06	0.117167	1	0.0117167	60.9	65.4	1.07389	0	0	0	0	0.521317	2	0
5	2007	35	50698814	6.90351e-07	0.0690351	1	0.00690351	61.2	65.8	1.07516	0	0	0	0	0.518295	2	0
5	2008	138366	51030006	0.00271146	271.146	4	27.1146	56.1	60.1	1.0713	0	0	0	0	0.516488	2	0
5	2009	24	51369725	4.67201e-07	0.0467201	1	0.00467201	61.9	66.6	1.07593	1	0	0.5	0	0.5158	2	0
5	2010	113	51733013	2.18429e-06	0.218429	1	0.0218429	62.2	66.9	1.07556	1	0	0.5	0	0.512951	2	0
5	2011	225	52125411	4.31651e-06	0.431651	1	0.0431651	62.6	67.3	1.07508	1	1	1	0	0.50817	2	0
6	1995	1725	69835713	2.47008e-05	2.47008	3	0.247008	63.8	69.4	1.08777	1	2	1.5	1	0.466306	1	8
6	1996	113	71437381	1.5818e-06	0.15818	1	0.015818	63.9	69.6	1.0892	1	2	1.5	1	0.467865	1	8
6	1997	67	73042605	9.17273e-07	0.0917273	1	0.00917273	64	69.8	1.09062	1	2	1.5	1	0.467588	1	8
6	1998	806	74656228	1.07962e-05	1.07962	2	0.107962	64.1	70	1.09204	1	2	1.5	1	0.469746	1	8
6	1999	380	76285225	4.98131e-06	0.498131	1	0.0498131	64.2	70.1	1.0919	1	2	1.5	1	0.466627	1	8
6	2000	748	77932247	9.59808e-06	0.959808	1	0.0959808	64.3	70.3	1.09331	2	2	2	2	0.466386	1	8
6	2001	630	79604541	7.91412e-06	0.791412	1	0.0791412	64.4	70.5	1.09472	1	2	1.5	1	0.463629	1	8
6	2002	320	81294378	3.93631e-06	0.393631	1	0.0393631	64.5	70.6	1.09457	1	2	1.5	1	0.459317	1	8
6	2003	352	82971734	4.24241e-06	0.424241	1	0.0424241	64.5	70.8	1.09767	1	2	1.5	1	0.455182	1	8
6	2004	1950	84596249	2.30507e-05	2.30507	3	0.230507	64.6	70.9	1.09752	1	2	1.5	1	0.453509	1	8
6	2005	39	86141373	4.52744e-07	0.0452744	1	0.00452744	64.7	71.1	1.09892	1	2	1.5	1	0.453482	1	8
6	2006	2984	87592899	3.40667e-05	3.40667	3	0.340667	64.7	71.2	1.10046	1	2	1.5	1	0.45289	1	8
6	2007	129	88965508	1.45e-06	0.145	1	0.0145	64.8	71.4	1.10185	1	2	1.5	1	0.448026	1	8
6	2008	959	90297115	1.06205e-05	1.06205	1	0.106205	64.8	71.5	1.1034	1	2	1.5	1	0.447097	1	8
6	2009	1307	91641881	1.4262e-05	1.4262	1	0.14262	64.9	71.6	1.10324	1	2	1.5	1	0.439786	1	8
6	2010	1113	93038902	1.19627e-05	1.19627	1	0.119627	64.9	71.8	1.10632	2	2	2	2	0.4364	1	8
6	2011	1989	94501233	2.10473e-05	2.10473	3	0.210473	65	71.9	1.10615	1	2	1.5	1	0.432033	1	8
7	1995	0	3524506	0	0	0	0	74.1	79.5	1.07287	1	1	1	0	0.337866	0	2
7	1996	0	3670704	0	0	0	0	74.6	80	1.07239	1	1	1	0	0.33834	0	2
7	1997	0	3796038	0	0	0	0	75.3	80.6	1.07039	2	1	1.5	1	0.337754	0	2
7	1998	0	3927213	0	0	0	0	75.5	80.8	1.0702	2	1	1.5	1	0.33732	0	2
7	1999	1	3958723	2.52607e-07	0.0252607	1	0.00252607	76.2	81.4	1.06824	2	2	2	2	0.337768	0	2
7	2000	2	4027887	4.96538e-07	0.0496538	1	0.00496538	76.6	81.7	1.06658	2	2	2	2	0.337617	0	2
7	2001	0	4138012	0	0	0	0	77.6	82.3	1.06057	2	2	2	2	0.336902	0	2
7	2002	0	4175950	0	0	0	0	77.7	82.4	1.06049	2	2	2	2	0.336392	0	2
7	2003	33	4114826	8.01978e-06	0.801978	1	0.0801978	78	82.9	1.06282	2	2	2	2	0.336248	0	2
7	2004	0	4166664	0	0	0	0	78.7	83.5	1.06099	2	2	2	2	0.335406	0	2
7	2005	0	4265762	0	0	0	0	79.1	83.7	1.05815	2	2	2	2	0.334326	0	2
7	2006	0	4401365	0	0	0	0	79.6	84	1.05528	2	2	2	2	0.333433	0	2
7	2007	0	4588599	0	0	0	0	79.5	84.3	1.06038	2	2	2	2	0.33245	0	2
7	2008	0	4839396	0	0	0	0	80.1	84.5	1.05493	2	2	2	2	0.331669	0	2
7	2009	0	4987573	0	0	0	0	80.7	85.1	1.05452	2	2	2	2	0.330749	0	2
7	2010	0	5076732	0	0	0	0	81.1	85.3	1.05179	2	2	2	2	0.32989	0	2
7	2011	0	5183688	0	0	0	0	81.3	85.8	1.05535	1	2	1.5	1	0.330671	0	2
8	1995	258	59266089	4.35325e-06	0.435325	1	0.0435325	67.7	73.4	1.08419	1	1	1	0	0.414879	1	9
8	1996	100	59878955	1.67004e-06	0.167004	1	0.0167004	67.9	73.7	1.08542	1	1	1	0	0.414423	1	9
8	1997	212	60544937	3.50153e-06	0.350153	1	0.0350153	68.1	73.9	1.08517	1	2	1.5	1	0.412898	1	9
8	1998	0	61250974	0	0	0	0	68.3	74.2	1.08638	1	2	1.5	1	0.411073	1	9
8	1999	22	61973957	3.54988e-07	0.0354988	1	0.00354988	68.5	74.4	1.08613	1	2	1.5	1	0.411454	1	9
8	2000	198	62693322	3.15823e-06	0.315823	1	0.0315823	68.7	74.6	1.08588	1	2	1.5	1	0.410974	1	9
8	2001	222	63415174	3.50074e-06	0.350074	1	0.0350074	68.8	74.8	1.08721	1	2	1.5	1	0.409662	1	9
8	2002	190	64136669	2.96242e-06	0.296242	1	0.0296242	69	75.1	1.08841	0	2	1	0	0.408768	1	9
8	2003	18	64817254	2.77704e-07	0.0277704	1	0.00277704	69.2	75.3	1.08815	0	2	1	0	0.403936	1	9
8	2004	8389	65404522	0.000128263	12.8263	4	1.28263	69.3	75.5	1.08947	0	1	0.5	0	0.399687	0	9
8	2005	86	65863973	1.30572e-06	0.130572	1	0.0130572	69.5	75.7	1.08921	0	1	0.5	0	0.399174	0	9
8	2006	280	66174486	4.23124e-06	0.423124	1	0.0423124	69.6	75.9	1.09052	0	1	0.5	0	0.396172	0	0
8	2007	53	66353572	7.98751e-07	0.0798751	1	0.00798751	69.8	76.1	1.09026	0	1	0.5	0	0.394072	0	2
8	2008	39	66453255	5.86879e-07	0.0586879	1	0.00586879	69.9	76.3	1.09156	0	1	0.5	0	0.392155	0	5
8	2009	15	66548197	2.25401e-07	0.0225401	1	0.00225401	70	76.4	1.09143	0	1	0.5	0	0.385639	0	5
8	2010	260	66692024	3.89852e-06	0.389852	1	0.0389852	70.2	76.6	1.09117	0	1	0.5	0	0.383902	0	5
8	2011	923	66902958	1.37961e-05	1.37961	2	0.137961	70.3	76.8	1.09246	1	1	1	0	0.384135	0	7
9	1995	0	856439	0	0	0	0	53.3	56.3	1.05629					0.643432	3
9	1996	0	859496	0	0	0	0	54.3	57.3	1.05525					0.646523	3
9	1997	0	853867	0	0	0	0	55.2	58.2	1.05435					0.649535	3
9	1998	0	845106	0	0	0	0	56	59	1.05357					0.654576	3
9	1999	0	841063	0	0	0	0	53.6	58.7	1.09515					0.655036	3
9	2000	0	847185	0	0	0	0	57.7	60.7	1.05199					0.658324	3
9	2001	1	865848	1.15494e-06	0.115494	1	0.0115494	58.5	61.5	1.05128	1	2	1.5	1	0.654529	3
9	2002	0	894837	0	0	0	0	59.4	62.3	1.04882					0.650965	3	6
9	2003	3	929431	3.22778e-06	0.322778	1	0.0322778	60.2	63.1	1.04817	2	2	2	2	0.651942	3	6
9	2004	0	962634	0	0	0	0	60.9	63.8	1.04762	1	2	1.5	1	0.654013	3	6
9	2005	22	979201	2.24673e-05	2.24673	3	0.224673	61.7	64.6	1.047	1	2	1.5	1	0.649514	3	6
9	2006	0	996052	0	0	0	0	62.4	65.2	1.04487	1	2	1.5	1	0.646264	3	7
9	2007	1	1013194	9.86978e-07	0.0986978	1	0.00986978	63	65.9	1.04603	1	2	1.5	1	0.640978	3	7
9	2008	0	1030630	0	0	0	0	63.7	66.5	1.04396	1	2	1.5	1	0.627935	3	7
9	2009	0	1048367	0	0	0	0	64.3	67.1	1.04355	1	2	1.5	1	0.623689	3	7
9	2010	0	1066409	0	0	0	0	64.6	67.5	1.04489	0	2	1	0	0.621059	3	7
9	2011	0	1120392	0	0	0	0	64.9	67.9	1.04622	0	2	1	0	0.621375	3	7
10	1995	269	71995500	3.73634e-06	0.373634	1	0.0373634	65.6	70.6	1.07622	1	2	1.5	1	0.520888	2	0
10	1996	1056	73156700	1.44348e-05	1.44348	2	0.144348	65.9	70.9	1.07587	1	2	1.5	1	0.51648	2	0
10	1997	3692	74306900	4.96858e-05	4.96858	3	0.496858	66.3	71.3	1.07541	1	2	1.5	1	0.517603	2	0
10	1998	647	75456300	8.5745e-06	0.85745	1	0.085745	66.5	71.6	1.07669	1	2	1.5	1	0.513127	2	0
10	1999	799	76596700	1.04313e-05	1.04313	2	0.104313	66.8	71.9	1.07635	1	2	1.5	1	0.509377	2	0
10	2000	592	77630900	7.62583e-06	0.762583	1	0.0762583	67.1	72.2	1.07601	1	2	1.5	1	0.494907	2	0
10	2001	392	78620500	4.98598e-06	0.498598	1	0.0498598	67.4	72.5	1.07567	1	2	1.5	1	0.493426	2	0
10	2002	147	79537700	1.84818e-06	0.184818	1	0.0184818	67.6	72.8	1.07692	1	2	1.5	1	0.492662	2	0
10	2003	148	80467400	1.83925e-06	0.183925	1	0.0183925	67.8	73	1.0767	2	2	2	2	0.490911	2	0
10	2004	231	81436400	2.83657e-06	0.283657	1	0.0283657	68.1	73.2	1.07489	2	3	2.5	3	0.487642	1	0
10	2005	324	82392100	3.93242e-06	0.393242	1	0.0393242	68.3	73.5	1.07613	1	2	1.5	1	0.484933	1	0
10	2006	579	83311200	6.94985e-06	0.694985	1	0.0694985	68.5	73.7	1.07591	2	2	2	2	0.48	1	0
10	2007	353	84218500	4.19148e-06	0.419148	1	0.0419148	68.7	73.9	1.07569	2	2	2	2	0.475153	1	0
10	2008	411	85118700	4.82855e-06	0.482855	1	0.0482855	69	74.2	1.07536	1	2	1.5	1	0.47244	1	0
10	2009	356	86025000	4.13833e-06	0.413833	1	0.0413833	69.2	74.5	1.07659	1	2	1.5	1	0.465265	1	0
10	2010	221	86932500	2.5422e-06	0.25422	1	0.025422	69.5	74.7	1.07482	1	2	1.5	1	0.461533	1	0
10	2011	138	87860300	1.57068e-06	0.157068	1	0.0157068	69.7	74.9	1.07461	1	2	1.5	1	0.457012	1	0

## Sheet: ZERO
Country	Year	Deaths	Population	DeathXPop		MagTRY	Magnitude	MaleEX	FemaleEX	Life	Weco	Wpol	Wsoc		WoTRY	Women	Women_OLD	Vulnerability	Democracy
1	1996	59	11022162	5.35285e-06	0.535285	2	1	55	59	1.07273	1	2	1	1.33333	2	2	2	1	3
1	1997	28	11338733	2.46941e-06	0.246941	2	1	55		0	1	2	1	1.33333	2	2	2	1	0
1	1998	490	11641509	4.20908e-05	4.20908	5	4	55	60	1.09091	1	2	1	1.33333	2	2	2	1	3
1	1999	63	11928306	5.28155e-06	0.528155	2	1	56	60	1.07143	1	2	1	1.33333	2	2	2	1	3
1	2000	347	12197905	2.84475e-05	2.84475	4	3	56	61	1.08929	1	2	1	1.33333	2	2	2	1	3
1	2001	56	12448881	4.4984e-06	0.44984	2	1	56	61	1.08929	1	2	1	1.33333	2	2	2	1	3
1	2002	29	12681984	2.28671e-06	0.228671	2	1	57	61	1.07018	1	2	1	1.33333	2	2	2	1	3
1	2005	23	13320058	1.72672e-06	0.172672	2	1	58	62	1.06897	1	2		1.5	3	2	3	1	3
1	2006	5	13525360	3.69676e-07	0.0369676	2	1	58	63	1.08621	1	2		1.5	3	2	3	1	3
1	2007	184	13728700	1.34026e-05	1.34026	2	1	59	63	1.0678	2	2	2	2	4	3	3	1	3
1	2009	19	14144337	1.34329e-06	0.134329	2	1	60	64	1.06667	1	2		1.5	3	2	3	1	3
1	2010	8	14363586	5.56964e-07	0.0556964	2	1	60	65	1.08333	1	2		1.5	3	2	3	1	3
1	2011	247	14593099	1.69258e-05	1.69258	3	2	60	65	1.08333	1	2		1.5	3	2	3	1	3
2	1995	239	196957845	1.21346e-06	0.121346	2	1	64	69	1.07812	1	2	1	1.33333	2	2	2	2	0
2	1996	402	199926615	2.01074e-06	0.201074	2	1	64	69	1.07812	1	2	1	1.33333	2	2	2	2	0
2	1997	1130	202853850	5.57051e-06	0.557051	2	1	65	69	1.06154	1	2	1	1.33333	2	2	2	2	0
2	1998	1490	205753493	7.24168e-06	0.724168	2	1	65	70	1.07692	1	2	1	1.33333	2	2	2	2	0
2	1999	162	208644079	7.76442e-07	0.0776442	2	1	65	70	1.07692	1	2	1	1.33333	2	2	2	2	7
2	2000	564	211540428	2.66616e-06	0.266616	2	1	66	70	1.06061	1	2	1	1.33333	2	2	2	2	7
2	2001	587	214448301	2.73726e-06	0.273726	2	1	66	71	1.07576	1	2	1	1.33333	2	2	2	2	7
2	2002	290	217369087	1.33414e-06	0.133414	2	1	66	71	1.07576	1	2	1	1.33333	2	2	2	2	7
2	2003	534	220307809	2.42388e-06	0.242388	2	1	67	72	1.07463	1	2	1	1.33333	2	2	2	2	7
2	2004	166604	223268606	0.000746204	74.6204	5	4	66	69	1.04545	1	2	0	1	1	2	2	2	8
2	2005	1325	226254703	5.85623e-06	0.585623	2	1	67	72	1.07463	1	2		1.5	2	2	3	2	8
2	2006	7421	229263980	3.23688e-05	3.23688	4	3	67	72	1.07463	0	2		1	1	1	2	2	8
2	2007	979	232296830	4.21444e-06	0.421444	2	1	68	73	1.07353	1	2	1	1.33333	2	2	2	2	8
2	2008	144	235360765	6.11827e-07	0.0611827	2	1	68	73	1.07353	1	2		1.5	2	2	3	2	8
2	2009	1485	238465165	6.22732e-06	0.622732	2	1	68	73	1.07353	0	2		1	1	1	2	2	8
2	2010	1294	241613126	5.35567e-06	0.535567	2	1	69	74	1.07246	1	2		1.5	2	2	3	2	8
2	2011	129	244808254	5.26943e-07	0.0526943	2	1	69	74	1.07246	1	2		1.5	2	2	3	2	8
3	1995	60	4857774	1.23513e-05	1.23513	2	1	49	53	1.08163	1	2	1	1.33333	2	2	2	1	0
3	1996	30	4966303	6.04071e-06	0.604071	2	1	50	54	1.08	1	2	1	1.33333	2	2	2	1	0
3	2000	59	5342879	1.10427e-05	1.10427	2	1	54	58	1.07407	2	2	2	2	4	3	3	1	0
3	2002	2	5502340	3.63482e-07	0.0363482	2	1	56	59	1.05357	2	2	2	2	4	3	3	1	0
3	2007	2	5939634	3.36721e-07	0.0336721	2	1	59	63	1.0678	2	2	2	2	4	3	3	1	0
3	2008	6	6045439	9.92484e-07	0.0992484	2	1	59	63	1.0678	3	2		2.5	4	4	4	1	0
3	2009	26	6153153	4.22548e-06	0.422548	2	1	60	64	1.06667	2	2		2	4	3	3	1	0
3	2010	0	6260544	0	0	1	1	60	64	1.06667	1	2		1.5	2	2	3	1	0
3	2011	48	6366909	7.53898e-06	0.753898	2	1	61	64	1.04918	1	2		1.5	2	2	3	1	0
4	1995	20	20725374	9.65001e-07	0.0965001	2	1	67	72	1.07463	1	2	1	1.33333	2	2	2	2	4
4	1996	333	21260881	1.56626e-05	1.56626	3	2	67	72	1.07463	1	2	1	1.33333	2	2	2	2	4
4	1997	97	21808125	4.44788e-06	0.444788	2	1	67	73	1.08955	1	2	1	1.33333	2	2	2	2	4
4	1998	105	22358128	4.69628e-06	0.469628	2	1	68	73	1.07353	2	2	1	1.66667	3	3	3	2	4
4	1999	1	22898579	4.36708e-08	0.00436708	2	1	68	73	1.07353	2	2	1	1.66667	3	3	3	2	4
4	2000	16	23420751	6.83155e-07	0.0683155	2	1	68	74	1.08824	2	2	1	1.66667	3	3	3	2	4
4	2001	11	23920963	4.59848e-07	0.0459848	2	1	69	74	1.07246	2	2	1	1.66667	3	3	3	2	4
4	2002	12	24401977	4.91763e-07	0.0491763	2	1	69	74	1.07246	2	2	1	1.66667	3	3	3	2	4
4	2003	10	24869423	4.021e-07	0.04021	2	1	69	75	1.08696	1	2	1	1.33333	2	2	2	2	4
4	2004	97	25332026	3.82914e-06	0.382914	2	1	69	75	1.08696	1	2	1	1.33333	2	2	2	2	4
4	2005	13	25796124	5.03952e-07	0.0503952	2	1	70	75	1.07143	1	2		1.5	2	2	3	2	4
4	2006	6	26263048	2.28458e-07	0.0228458	2	1	70	75	1.07143	1	2		1.5	2	2	3	2	4
4	2007	102	26730607	3.81585e-06	0.381585	2	1	70	76	1.08571	3	2	1	2	4	4	3	2	4
4	2011	18	28572970	6.29966e-07	0.0629966	2	1	71	77	1.08451	1	2		1.5	2	2	3	3	6
5	1995	51	44710931	1.14066e-06	0.114066	2	1	57	61	1.07018	1	0	2	1	1	1	2	1	0
5	1997	68	45895991	1.48161e-06	0.148161	2	1	58	62	1.06897	1	0	1	0.666667	1	1	2	1	0
5	1999	22	47106923	4.67023e-07	0.0467023	2	1	58	63	1.08621	1	0	2	1	1	1	2	1	0
5	2001	51	48195684	1.05819e-06	0.105819	2	1	59	63	1.0678	2	0	2	1.33333	2	1	2	1	0
5	2002	21	48689952	4.313e-07	0.04313	2	1	60	64	1.06667	2	0	2	1.33333	2	1	2	1	0
5	2004	307	49582751	6.19167e-06	0.619167	2	1	60	65	1.08333	1	0	3	1.33333	2	1	2	1	0
5	2005	17	49984704	3.40104e-07	0.0340104	2	1	61	65	1.06557	1	0		0.5	1	1	2	1	0
5	2006	59	50355559	1.17167e-06	0.117167	2	1	61	65	1.06557	0	0		0	1	1	1	1	0
5	2007	35	50698814	6.90351e-07	0.0690351	2	1	61	66	1.08197	0	0	0	0	1	1	1	1	0
5	2008	138366	51030006	0.00271146	271.146	5	4	56	60	1.07143	0	0		0	1	1	1	1	0
5	2009	24	51369725	4.67201e-07	0.0467201	2	1	62	67	1.08065	1	0		0.5	1	1	2	1	0
5	2010	113	51733013	2.18429e-06	0.218429	2	1	62	67	1.08065	1	0		0.5	1	1	2	1	0
5	2011	225	52125411	4.31651e-06	0.431651	2	1	63	67	1.06349	1	1		1	1	1	2	1	0
6	1995	1725	69835713	2.47008e-05	2.47008	4	2	64	69	1.07812	1	2	1	1.33333	2	2	2	1	8
6	1996	113	71437381	1.5818e-06	0.15818	2	1	64	70	1.09375	1	2	1	1.33333	2	2	2	1	8
6	1997	67	73042605	9.17273e-07	0.0917273	2	1	64	70	1.09375	1	2	1	1.33333	2	2	2	1	8
6	1998	806	74656228	1.07962e-05	1.07962	2	1	64	70	1.09375	1	2	1	1.33333	2	2	2	1	8
6	1999	380	76285225	4.98131e-06	0.498131	2	1	64	70	1.09375	1	2	1	1.33333	2	2	2	1	8
6	2000	748	77932247	9.59808e-06	0.959808	2	1	64	70	1.09375	2	2	2	2	4	3	3	1	8
6	2001	630	79604541	7.91412e-06	0.791412	2	1	64	71	1.10938	1	2	1	1.33333	2	2	2	1	8
6	2002	320	81294378	3.93631e-06	0.393631	2	1	65	71	1.09231	1	2	1	1.33333	2	2	2	2	8
6	2003	352	82971734	4.24241e-06	0.424241	2	1	65	71	1.09231	1	2	1	1.33333	2	2	2	2	8
6	2004	1950	84596249	2.30507e-05	2.30507	4	2	65	71	1.09231	1	2	1	1.33333	2	2	2	2	8
6	2005	39	86141373	4.52744e-07	0.0452744	2	1	65	71	1.09231	1	2		1.5	2	2	3	2	8
6	2006	2984	87592899	3.40667e-05	3.40667	4	3	65	71	1.09231	1	2		1.5	2	2	3	2	8
6	2007	129	88965508	1.45e-06	0.145	2	1	65	71	1.09231	1	2	1	1.33333	2	2	2	2	8
6	2008	959	90297115	1.06205e-05	1.06205	2	1	65	72	1.10769	1	2		1.5	2	2	3	2	8
6	2009	1307	91641881	1.4262e-05	1.4262	2	1	65	72	1.10769	1	2		1.5	2	2	3	2	8
6	2010	1113	93038902	1.19627e-05	1.19627	2	1	65	72	1.10769	2	2		2	4	3	3	2	8
6	2011	1989	94501233	2.10473e-05	2.10473	4	2	65	72	1.10769	1	2		1.5	2	2	3	2	8
7	1999	1	3958723	2.52607e-07	0.0252607	2	1	76	81	1.06579	2	2	1	1.66667	3	3	3	3	2
7	2000	2	4027887	4.96538e-07	0.0496538	2	1	77	82	1.06494	2	2	1	1.66667	3	3	3	3	2
7	2003	33	4114826	8.01978e-06	0.801978	2	1	78	83	1.0641	2	2	2	2	4	3	3	3	2
8	1995	258	59266089	4.35325e-06	0.435325	2	1	68	73	1.07353	1	1	1	1	1	1	2	2	9
8	1996	100	59878955	1.67004e-06	0.167004	2	1	68	74	1.08824	1	1	2	1.33333	2	1	2	2	9
8	1997	212	60544937	3.50153e-06	0.350153	2	1	68	74	1.08824	1	2	2	1.66667	3	2	3	2	9
8	1998	0	61250974	0	0	1	1	68	74	1.08824	1	2	2	1.66667	3	2	3	2	9
8	1999	22	61973957	3.54988e-07	0.0354988	2	1	69	74	1.07246	1	2	2	1.66667	3	2	3	2	9
8	2000	198	62693322	3.15823e-06	0.315823	2	1	69	75	1.08696	1	2	2	1.66667	3	2	3	2	9
8	2001	222	63415174	3.50074e-06	0.350074	2	1	69	75	1.08696	1	2	2	1.66667	3	2	3	2	9
8	2002	190	64136669	2.96242e-06	0.296242	2	1	69	75	1.08696	0	2	2	1.33333	2	1	2	2	9
8	2003	18	64817254	2.77704e-07	0.0277704	2	1	69	75	1.08696	0	2	2	1.33333	2	1	2	2	9
8	2004	8389	65404522	0.000128263	12.8263	5	4	69	76	1.10145	0	1	2	1	1	1	2	2	9
8	2005	86	65863973	1.30572e-06	0.130572	2	1	70	76	1.08571	0	1	2	1	1	1	2	2	9
8	2006	280	66174486	4.23124e-06	0.423124	2	1	70	76	1.08571	0	1	2	1	1	1	2	2	0
8	2007	53	66353572	7.98751e-07	0.0798751	2	1	70	76	1.08571	0	1	2	1	1	1	2	2	2
8	2008	39	66453255	5.86879e-07	0.0586879	2	1	70	76	1.08571	0	1	2	1	1	1	2	2	5
8	2009	15	66548197	2.25401e-07	0.0225401	2	1	70	76	1.08571	0	1	2	1	1	1	2	2	5
8	2010	260	66692024	3.89852e-06	0.389852	2	1	70	77	1.1	0	1	2	1	1	1	2	2	5
8	2011	923	66902958	1.37961e-05	1.37961	2	1	70	77	1.1	1	1	2	1.33333	2	1	2	2	7
9	2001	1	865848	1.15494e-06	0.115494	2	1	59	62	1.05085	1	2	1	1.33333	2	2	2	1
9	2003	3	929431	3.22778e-06	0.322778	2	1	60	63	1.05	2	2	1	1.66667	3	3	3	1	6
9	2005	22	979201	2.24673e-05	2.24673	4	2	62	65	1.04839	1	2		1.5	2	2	3	1	6
9	2007	1	1013194	9.86978e-07	0.0986978	2	1	63	66	1.04762	1	2	1	1.33333	2	2	2	1	7
10	1995	269	71995500	3.73634e-06	0.373634	2	1	66	71	1.07576	1	2	1	1.33333	2	2	2	1	0
10	1996	1056	73156700	1.44348e-05	1.44348	2	1	66	71	1.07576	1	2	1	1.33333	2	2	2	1	0
10	1997	3692	74306900	4.96858e-05	4.96858	5	4	66	71	1.07576	1	2	1	1.33333	2	2	2	1	0
10	1998	647	75456300	8.5745e-06	0.85745	2	1	67	72	1.07463	1	2	1	1.33333	2	2	2	1	0
10	1999	799	76596700	1.04313e-05	1.04313	2	1	67	72	1.07463	1	2	1	1.33333	2	2	2	1	0
10	2000	592	77630900	7.62583e-06	0.762583	2	1	67	72	1.07463	1	2	1	1.33333	2	2	2	1	0
10	2001	392	78620500	4.98598e-06	0.498598	2	1	67	73	1.08955	1	2	1	1.33333	2	2	2	1	0
10	2002	147	79537700	1.84818e-06	0.184818	2	1	68	73	1.07353	1	2	1	1.33333	2	2	2	1	0
10	2003	148	80467400	1.83925e-06	0.183925	2	1	68	73	1.07353	2	2	2	2	4	3	3	1	0
10	2004	231	81436400	2.83657e-06	0.283657	2	1	68	73	1.07353	2	3	0	1.66667	3	4	3	1	0
10	2005	324	82392100	3.93242e-06	0.393242	2	1	68	74	1.08824	1	2		1.5	2	2	3	1	0
10	2006	579	83311200	6.94985e-06	0.694985	2	1	69	74	1.07246	2	2		2	4	3	3	1	0
10	2007	353	84218500	4.19148e-06	0.419148	2	1	69	74	1.07246	2	2	1	1.66667	3	3	3	1	0
10	2008	411	85118700	4.82855e-06	0.482855	2	1	69	74	1.07246	1	2		1.5	2	2	3	1	0
10	2009	356	86025000	4.13833e-06	0.413833	2	1	69	75	1.08696	1	2		1.5	2	2	3	1	0
10	2010	221	86932500	2.5422e-06	0.25422	2	1	70	75	1.07143	1	2		1.5	2	2	3	1	0
10	2011	138	87860300	1.57068e-06	0.157068	2	1	70	75	1.07143	1	2		1.5	2	2	3	2	0
